# Supplementary material for: Designing supported ZnNi catalysts for the removal of oxygen from bio-liquids and aromatics from diesel
Source: Royal Society of Chemistry journal article supplement (doi:10.1039/c2gc35901d), 2012-01-01
Supplement: c2gc35901d.pdf [file c2gc35901d.pdf]

## Supporting Information

# Designing supported ZnNi catalysts for the removal of oxygen from bio-liquids and aromatics from diesel

C.V. Loricera<sup>a</sup>, P. Castaño<sup>b\*</sup>, A. Infantes-Molina<sup>a,c</sup>, I. Hita<sup>b</sup>, A. Gutiérrez<sup>b</sup>, J.M. Arandes<sup>b</sup>, J.L.G. Fierro<sup>a</sup> and B. Pawelec<sup>a</sup>

<sup>a</sup> Institute of Catalysis and Petrochemistry, CSIC, C/Marie Curie, 2, Cantoblanco, 28049 Madrid, Spain

<sup>b</sup> University of the Basque Country (UPV-EHU), Chemical Engineering Department, 644-48080 Bilbao, Spain

<sup>c</sup> UA CSIC-Universidad de Malaga, Málaga, Spain

\* Corresponding authors: [pedro.castano@ehu.es](mailto:pedro.castano@ehu.es)

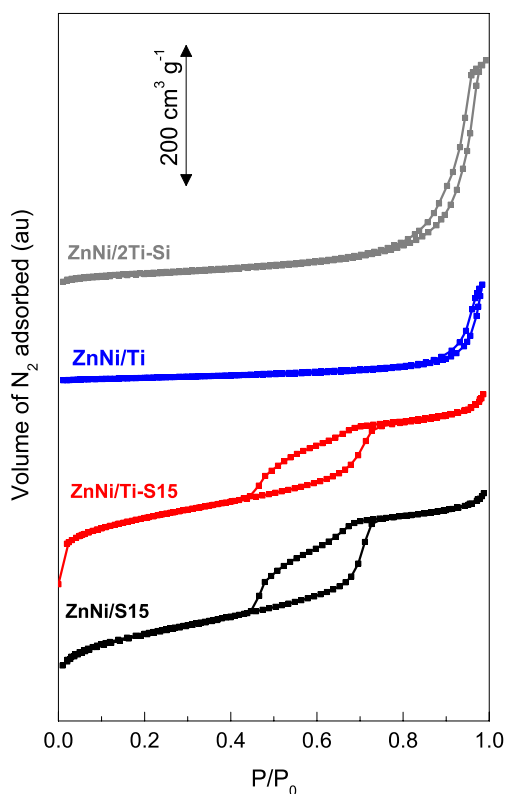

**Fig. 1.** N<sub>2</sub> adsorption-desorption isotherms at -196 °C of calcined ZnNi catalysts.

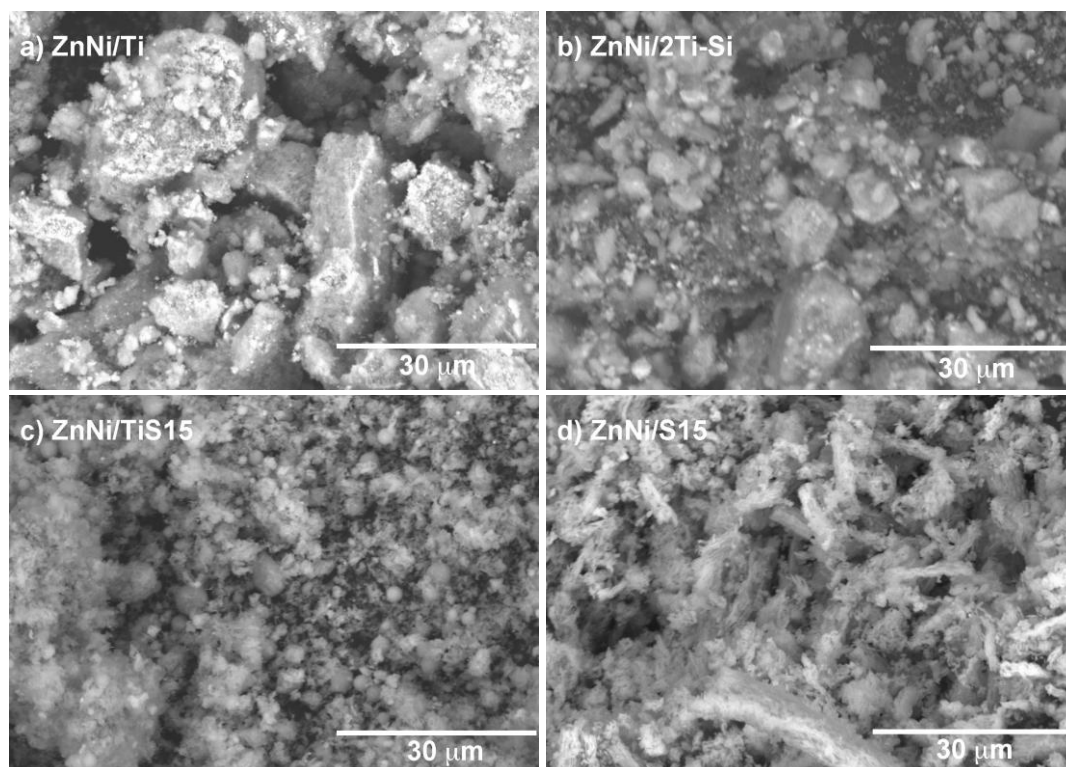

**Fig. 2.** SEM pictures of spent ZnNi catalysts tested in HDO of phenol ( $T = 310\text{ }^{\circ}\text{C}$ ,  $P = 3\text{ MPa}$ ,  $WHSV = 2.57\text{ h}^{-1}$ ).

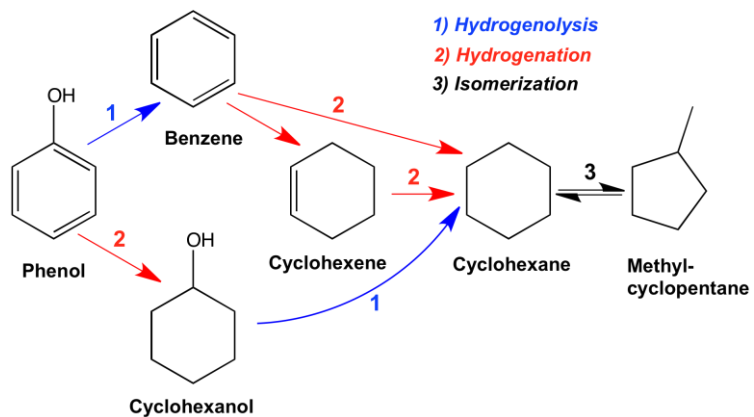

**Scheme 1.** Scheme of the phenol HDO over supported ZnNi catalysts.

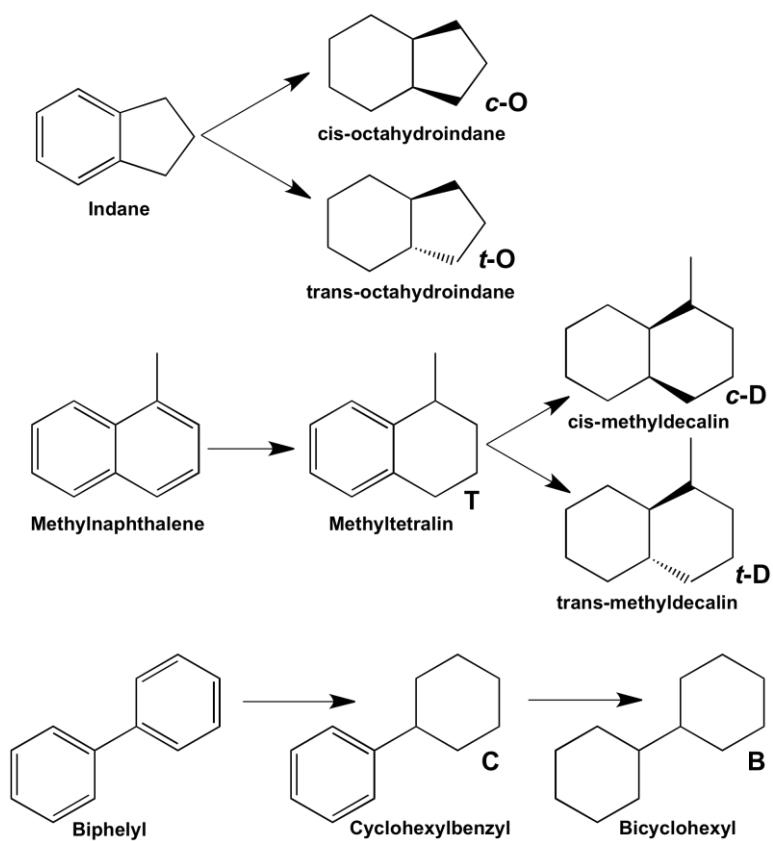

**Scheme 2.** Reaction pathways for hydrotreating of aromatics present in synthetic diesel on supported ZnNi catalysts.
